# Supplementary material for: Adult neurogenesis in the short-lived teleost Nothobranchius furzeri: localization of neurogenic niches, molecular characterization and effects of aging
Source: PubMed Central journal article supplement (PMC3437507; doi:10.1111/j.1474-9726.2011.00781.x), 2012-04

**Coronal sections**  
**(complete series ca 50 $\mu$ m -step, rostro- caudal direction)**

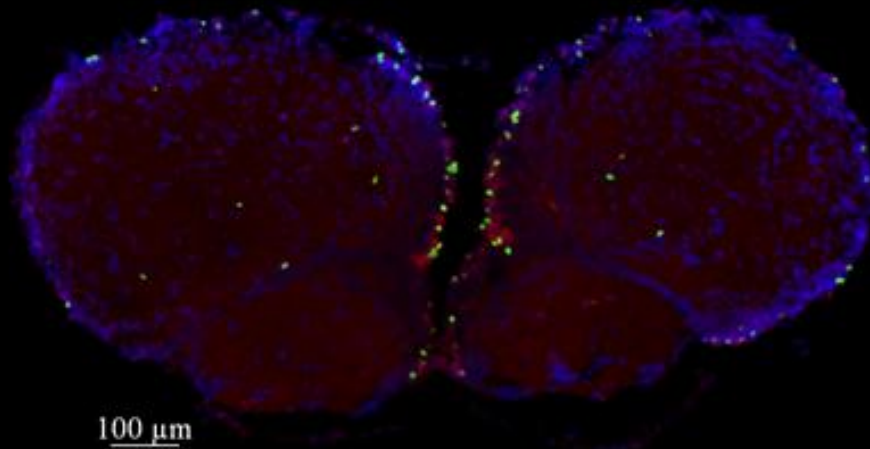

**Coronal sections**  
**(complete series ca 50 $\mu$ m -step, rostro- caudal direction)**

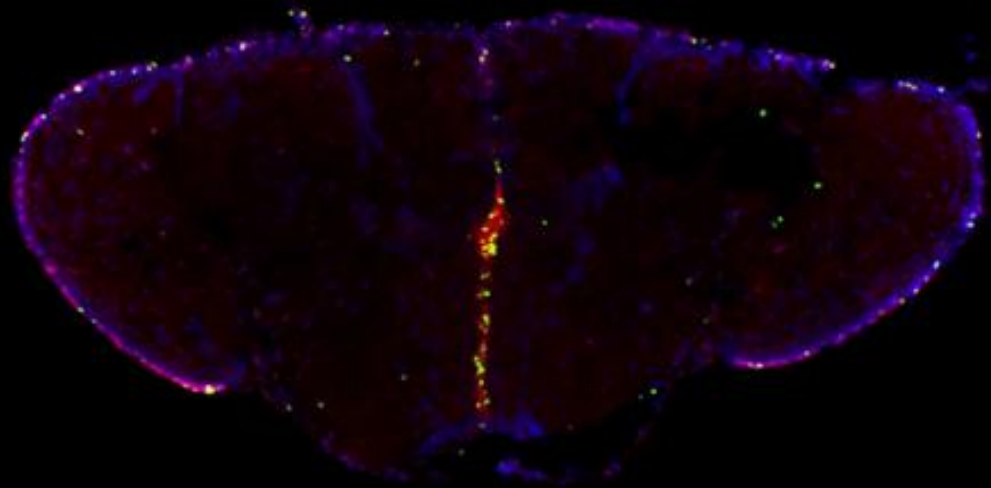

**Coronal sections**  
**(complete series ca 50 $\mu$ m -step, rostro- caudal direction)**

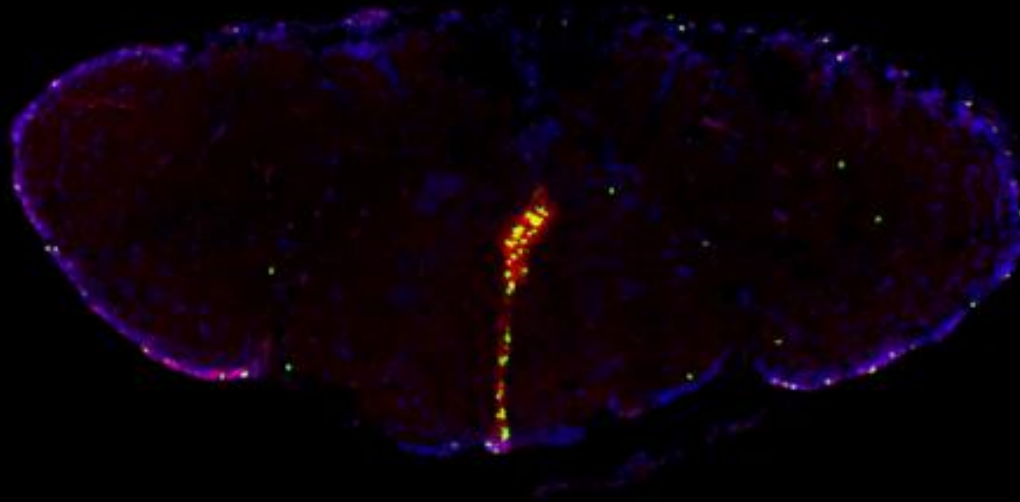

**Coronal sections**  
**(complete series ca 50 $\mu$ m -step, rostro- caudal direction)**

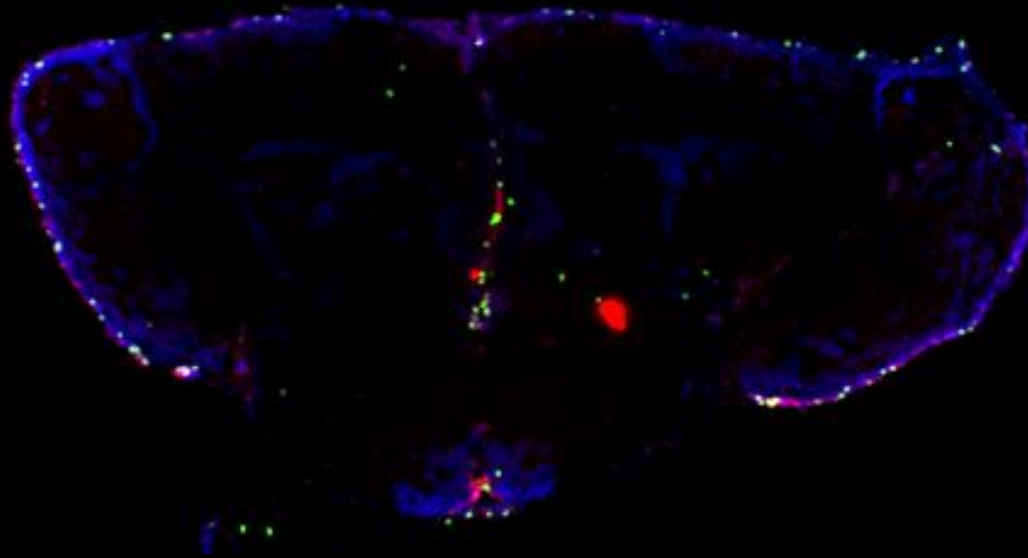

**Coronal sections**  
**(complete series ca 50 $\mu$ m -step, rostro- caudal direction)**

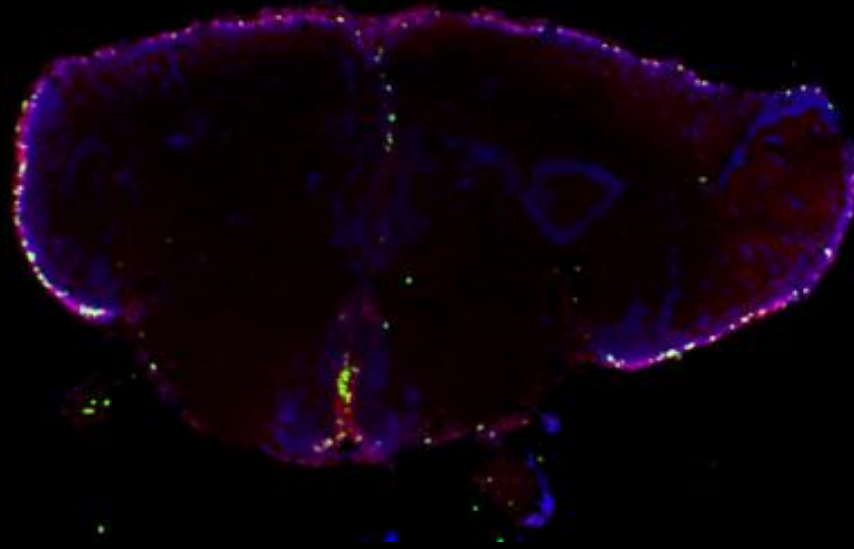

**Coronal sections**  
**(complete series ca 50 $\mu$ m -step, rostro- caudal direction)**

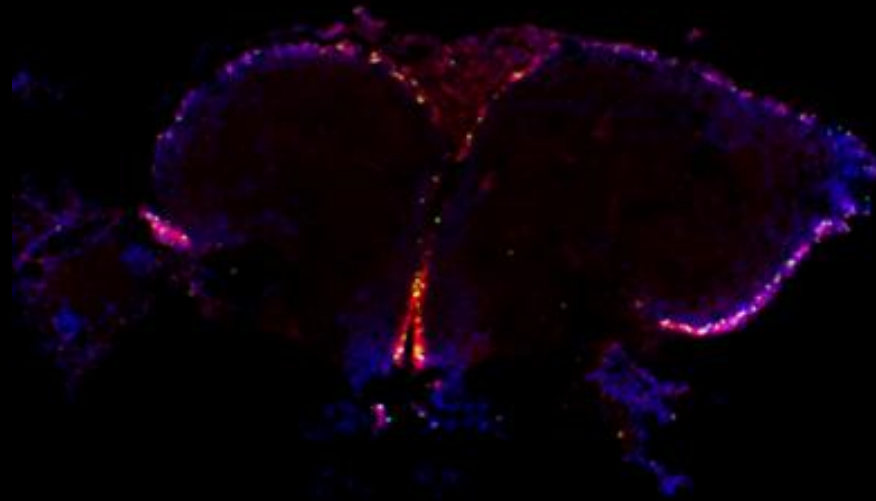

**Coronal sections**  
**(complete series ca 50 $\mu$ m -step, rostro- caudal direction)**

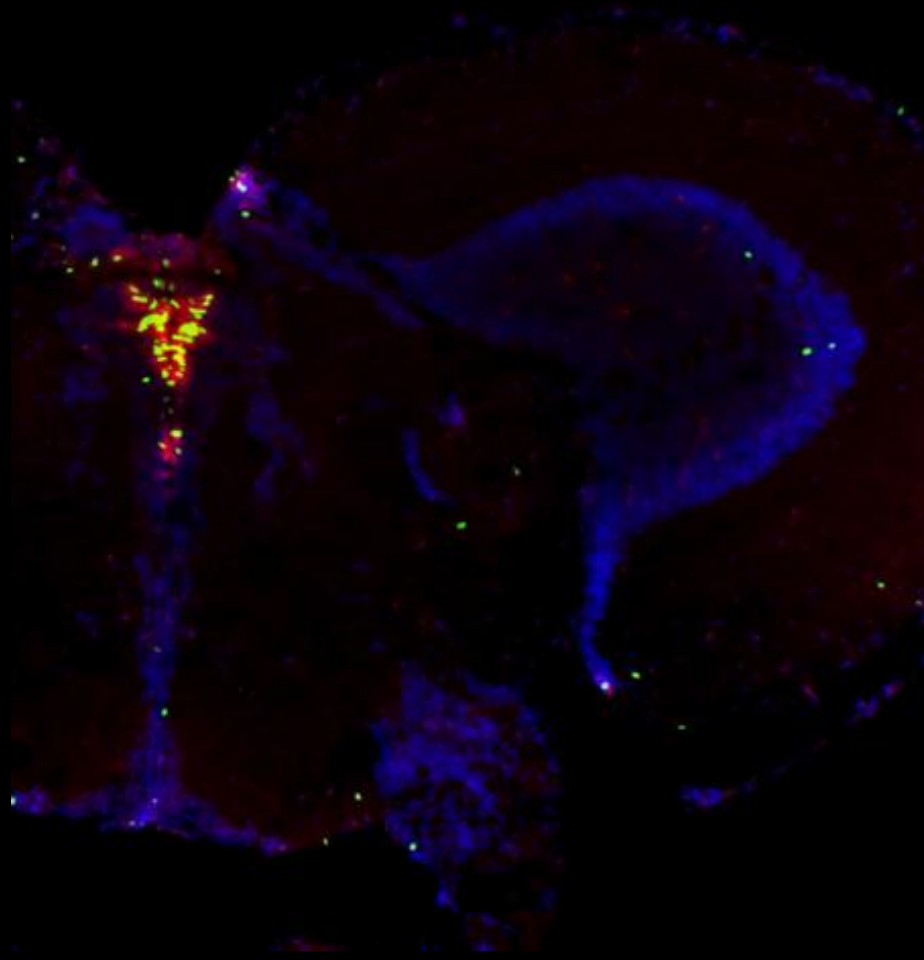

**Coronal sections**  
**(complete series ca 50 $\mu$ m -step, rostro- caudal direction)**

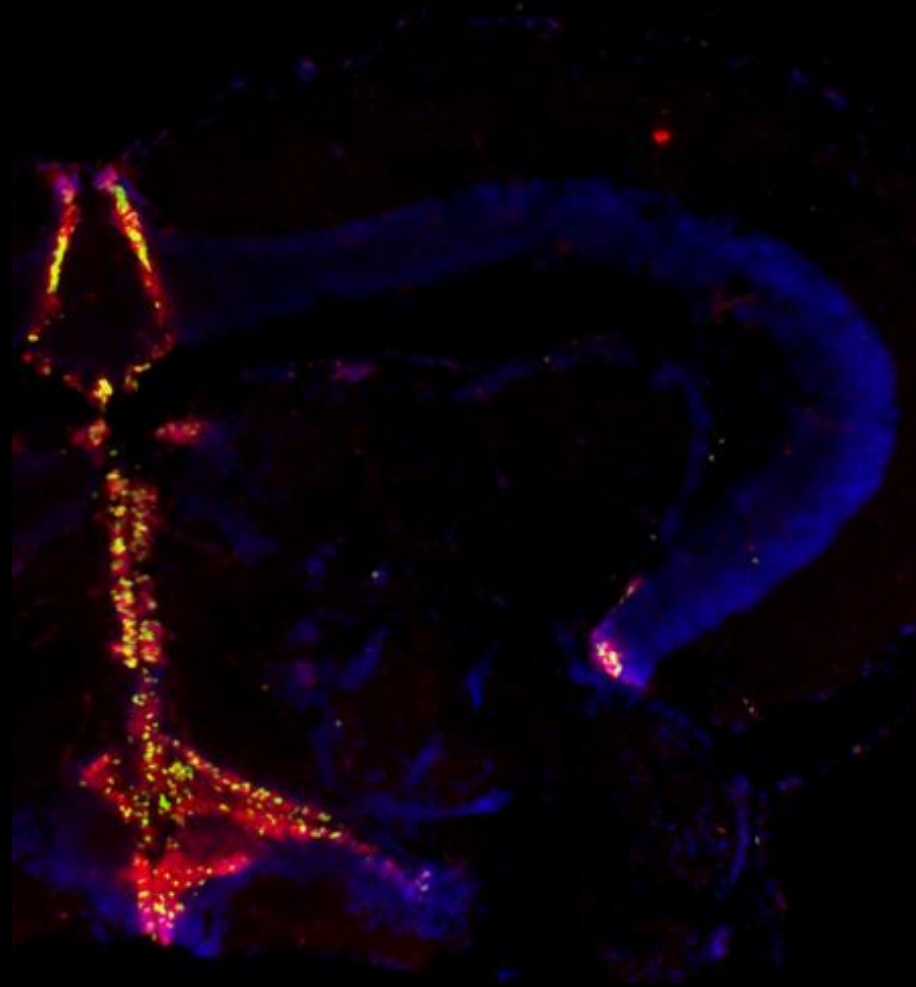



**Coronal sections**  
**(complete series ca 50 $\mu$ m -step, rostro- caudal direction)**

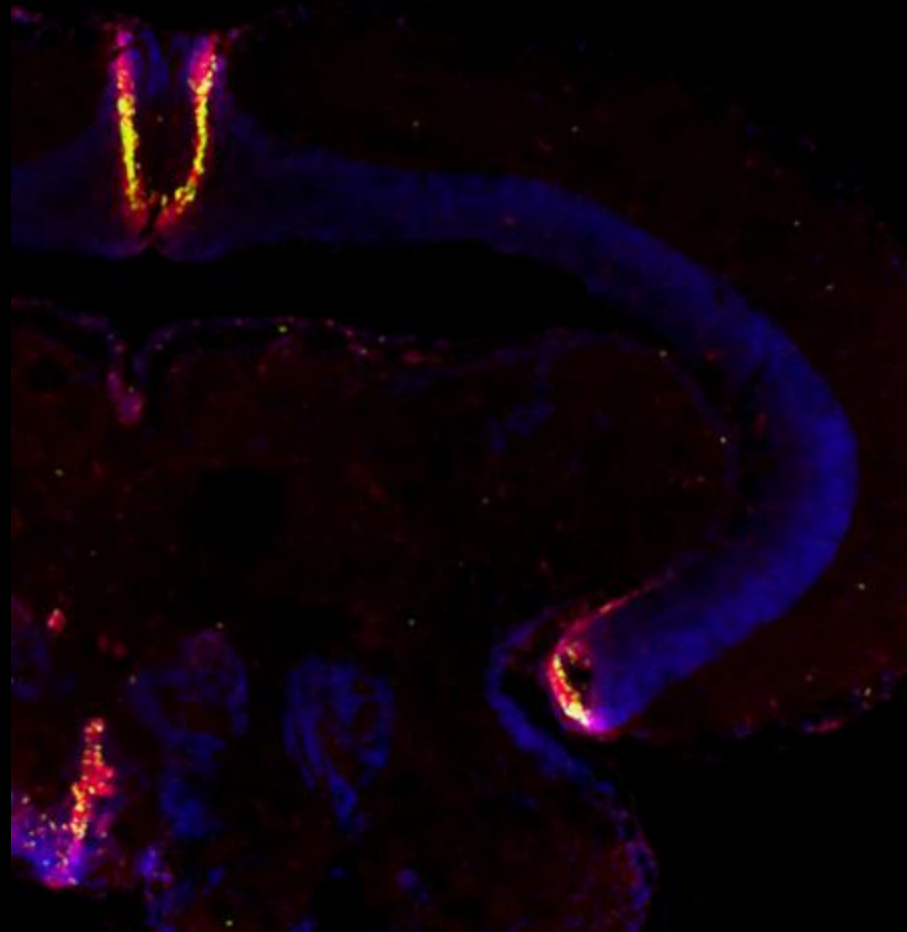

**Coronal sections**  
**(complete series ca 50 $\mu$ m -step, rostro- caudal direction)**

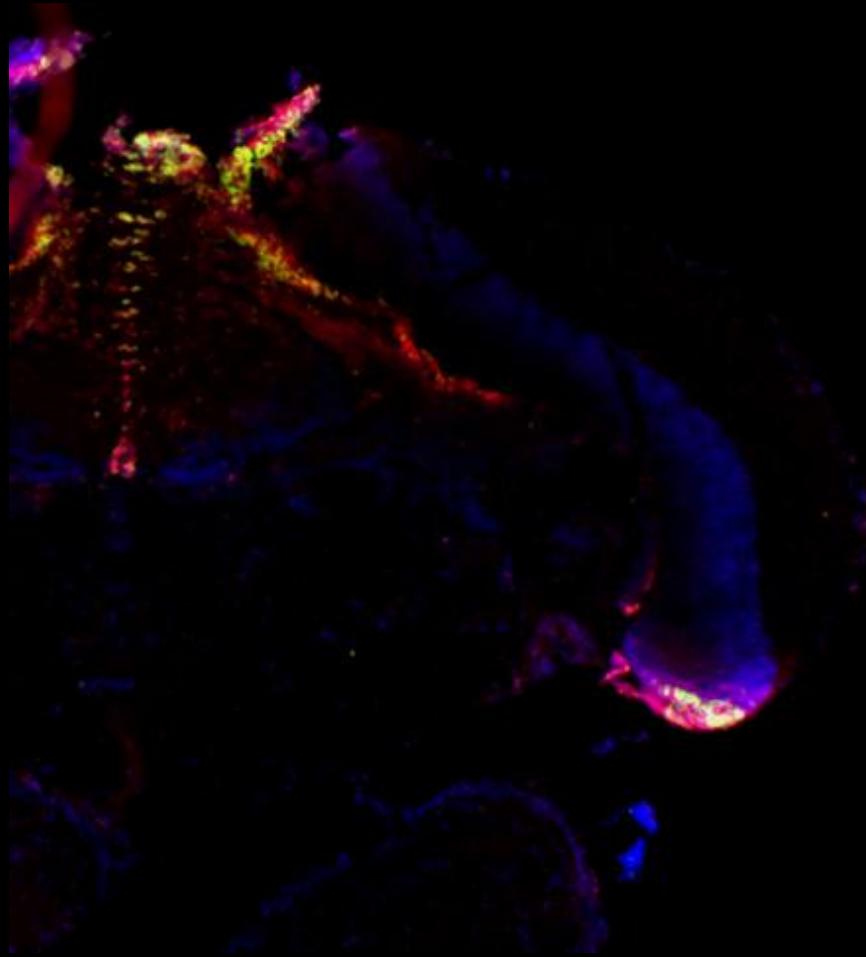

**Coronal sections**  
**(complete series ca 50 $\mu$ m -step, rostro- caudal direction)**

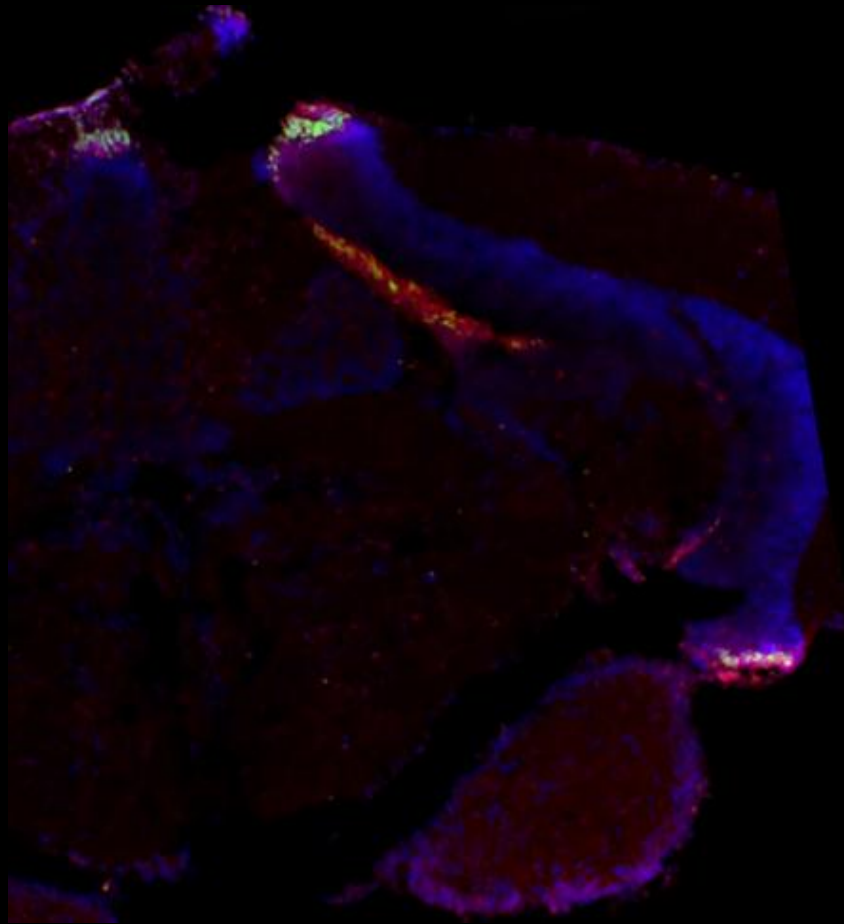

Supplement: acel0011-0241-SD2.pdf [file acel0011-0241-SD2.pdf]
